# Supplementary material
Source: Springer Nature journal article supplement (https://www.springermedizin.de/resource/supplementary/13046_2014_768_MOESM1_ESM.pdf/9662910)

A

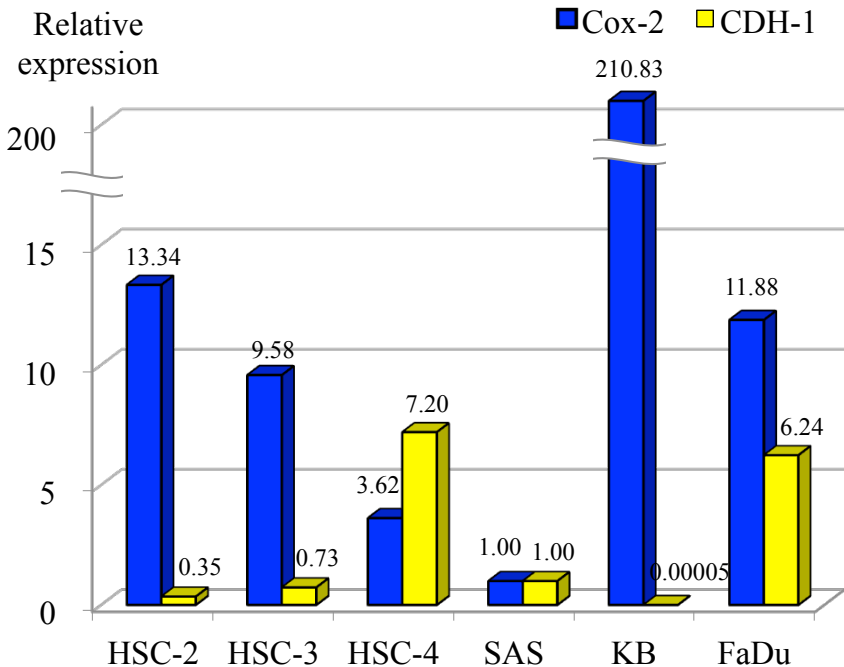

B

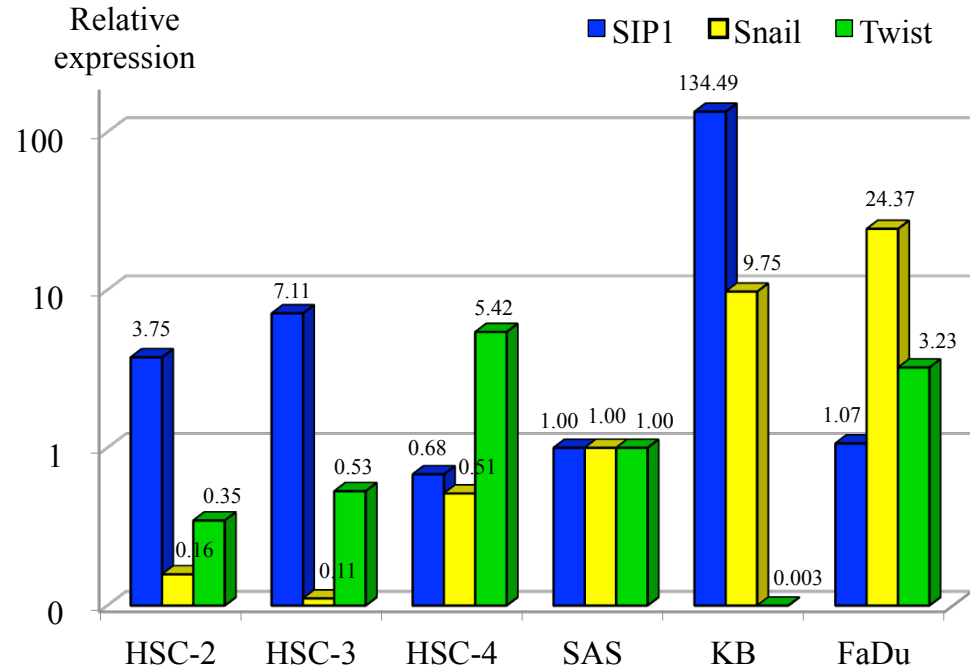

Supplement: MOESM1 [file 9662910]
